# Supplementary material for: Impact of increased resolution on Arctic Ocean simulations in Ocean Model Intercomparison Project phase 2 (OMIP-2)
Source: Copernicus journal article supplement (doi:10.5194/gmd-17-347-2024), 2024-01-15
Supplement: Supplementary file 1 [file gmd-17-347-2024-supplement.pdf]

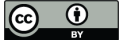

*Supplement of*

## **Impact of increased resolution on Arctic Ocean simulations in Ocean Model Intercomparison Project phase 2 (OMIP-2)**

**Qiang Wang et al.**

*Correspondence to:* Qiang Wang ([qiang.wang@awi.de](mailto:qiang.wang@awi.de))

The copyright of individual parts of the supplement might differ from the article licence.

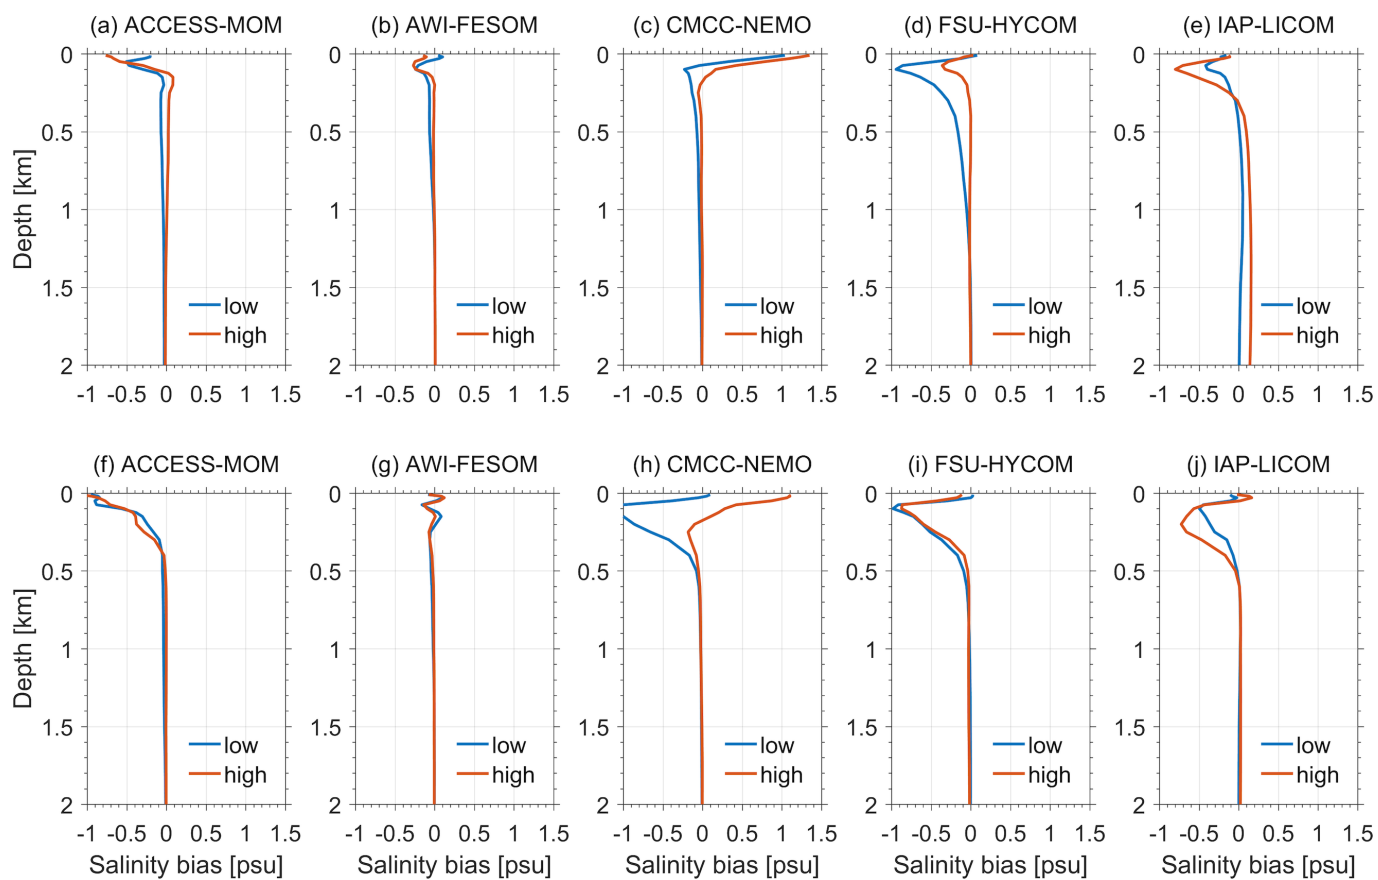

**Figure S1.** Biases of basin-mean salinity for (a-e) the Eurasian Basin and (f-j) the Amerasian Basin averaged over 1971–2000. The biases are calculated relative to the PHC3 climatology.

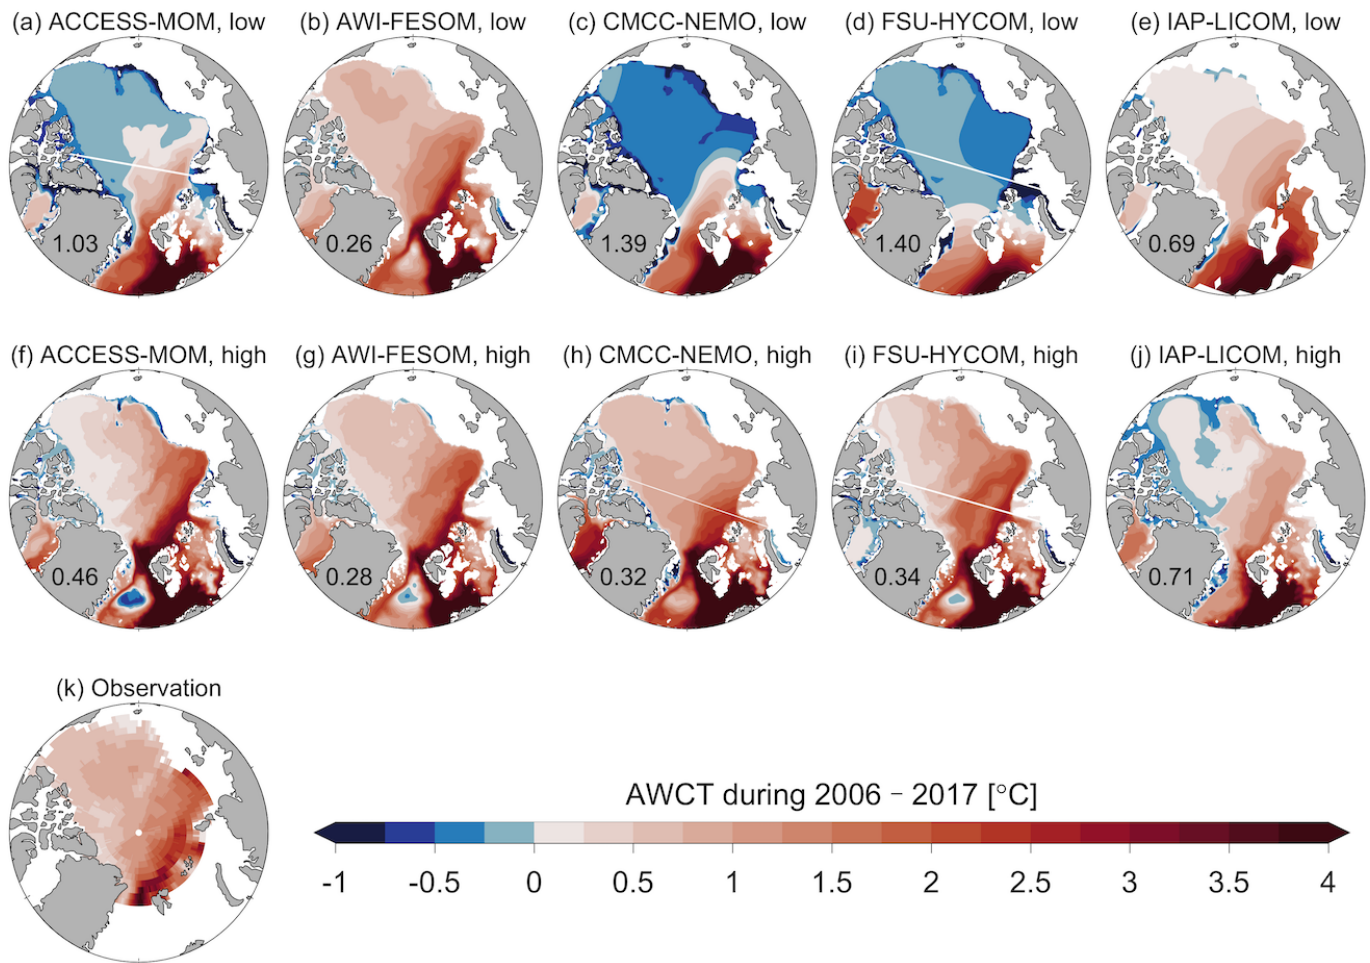

**Figure S2.** Simulated Atlantic Water core temperature (AWCT) averaged over 2006–2017 (a–j). (k) The AWCT for the same period based on observations (Polyakov et al., 2020). The model root-mean-square errors in the Arctic basin are displayed in each respective panel.

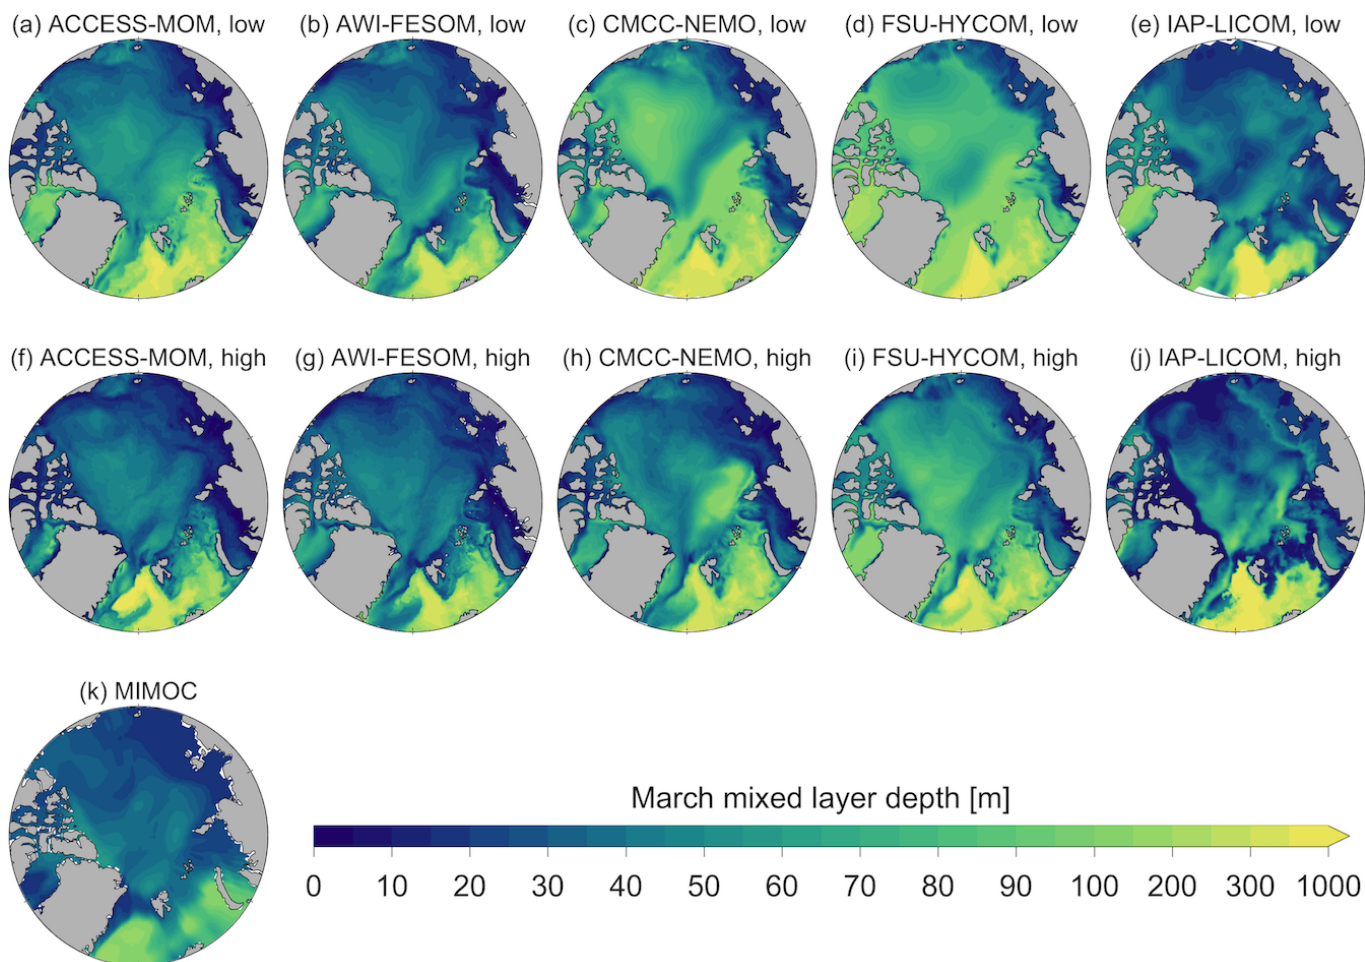

**Figure S3.** Mixed layer depth (MLD) in March averaged over 1971–2010. The MIMOC observational estimate (Schmidtke et al., 2013) is shown in (k). The density threshold for defining the MLD is  $0.03 \text{ kg/m}^3$  in this figure, different from Fig. 12 in the main text. This figure indicates that using a different MLD definition provides largely the same findings as described in the main text.

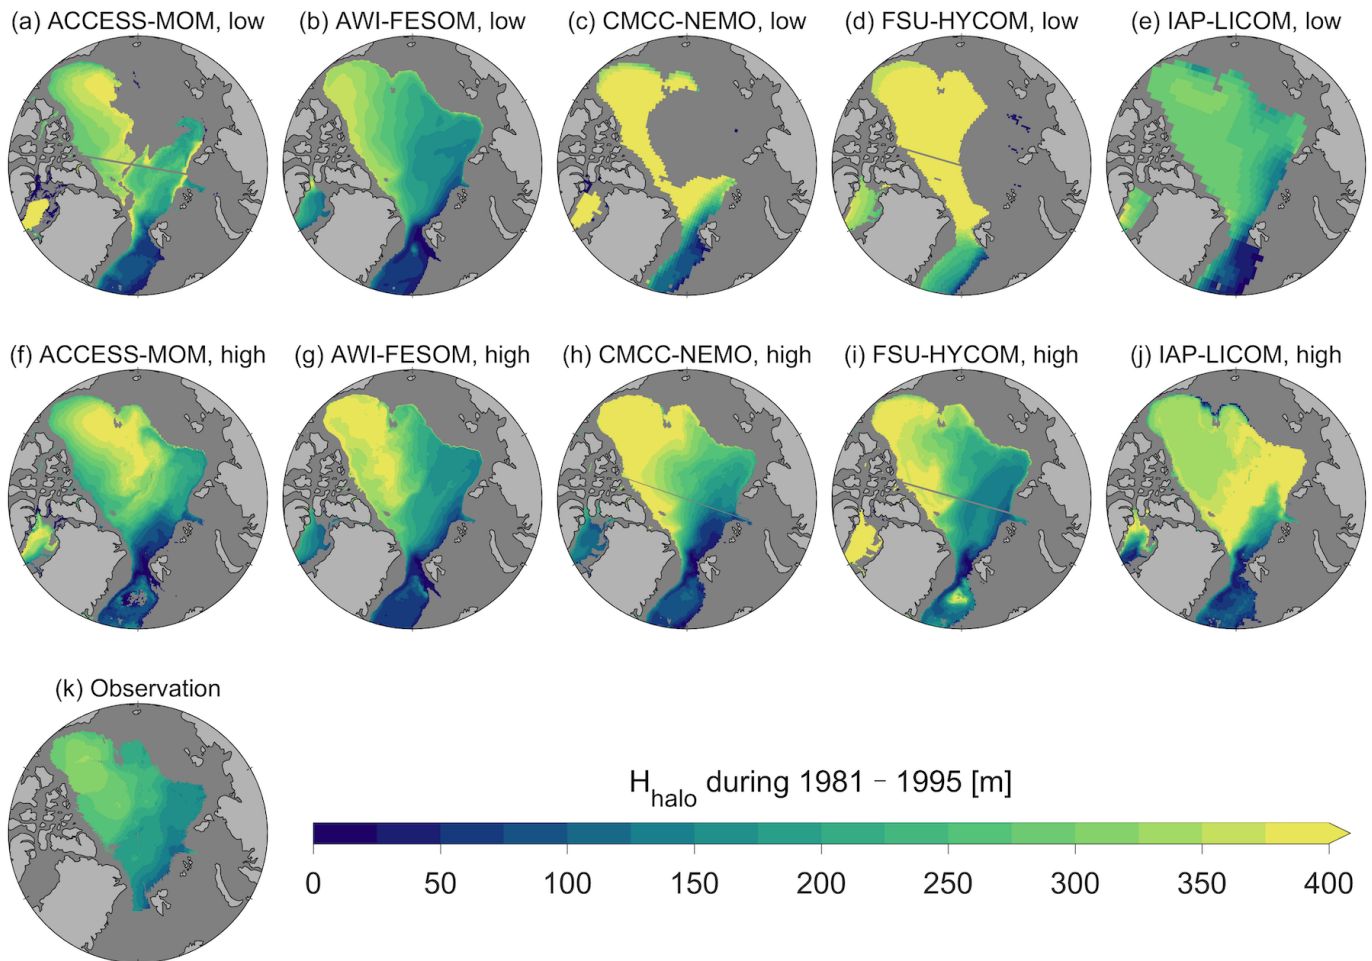

**Figure S4.** Cold halocline base depth averaged over 1981–1995 in low-resolution (a)-(e) and high-resolution (f)-(j) models. The observational estimate is shown in (k) (Polyakov et al., 2020).

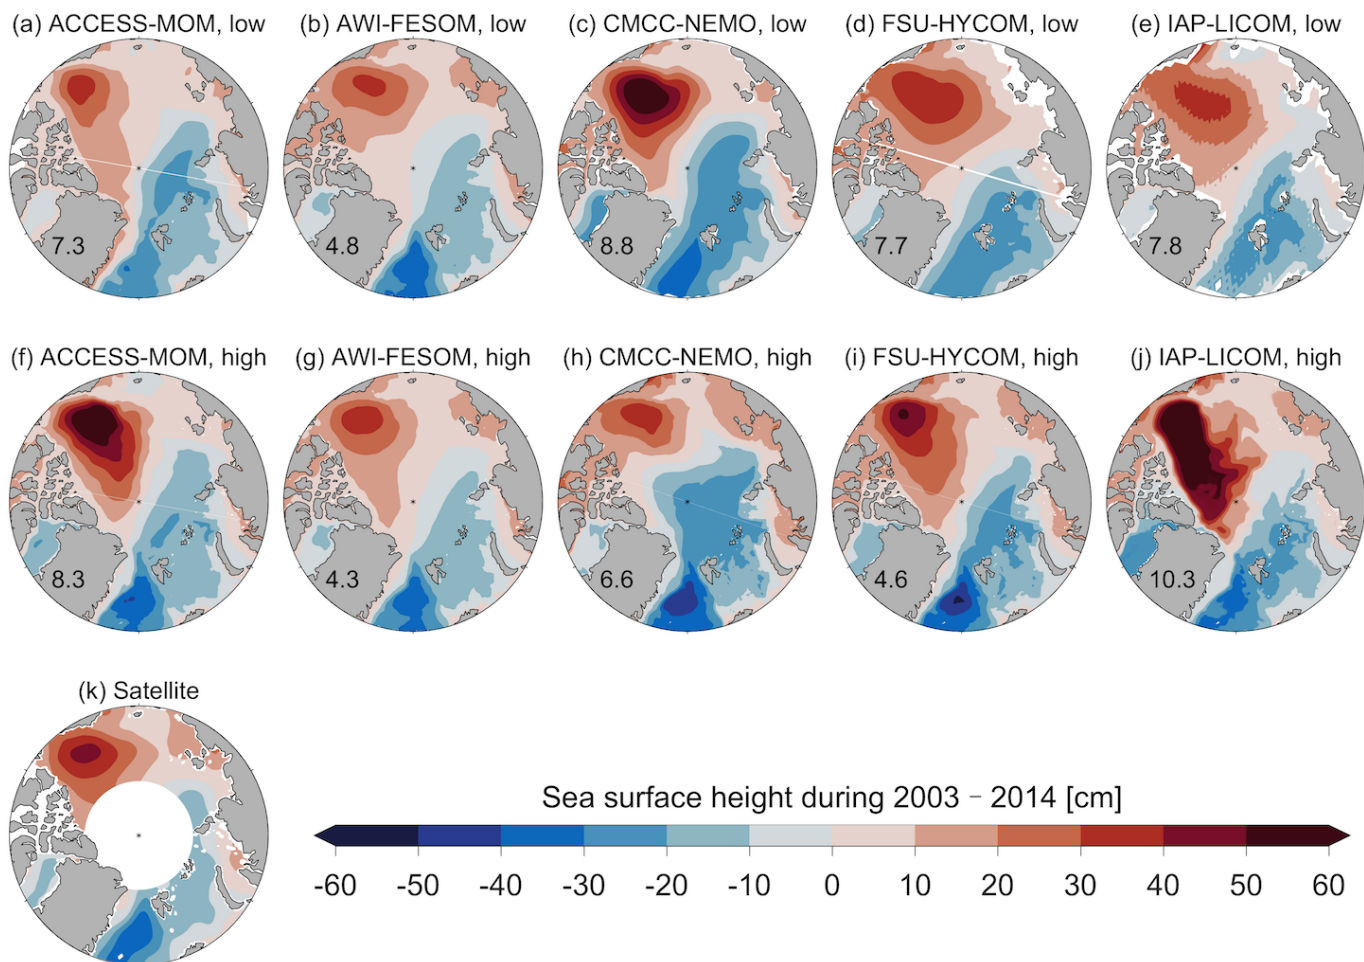

**Figure S5.** Sea surface height (ocean dynamic topography) averaged over 2003–2014 in low-resolution (a)–(e) and high-resolution (f)–(j) models. The satellite observation is shown in (k) (Armitage et al., 2017). The model root-mean-square errors in the Arctic basin are displayed in each respective panel.

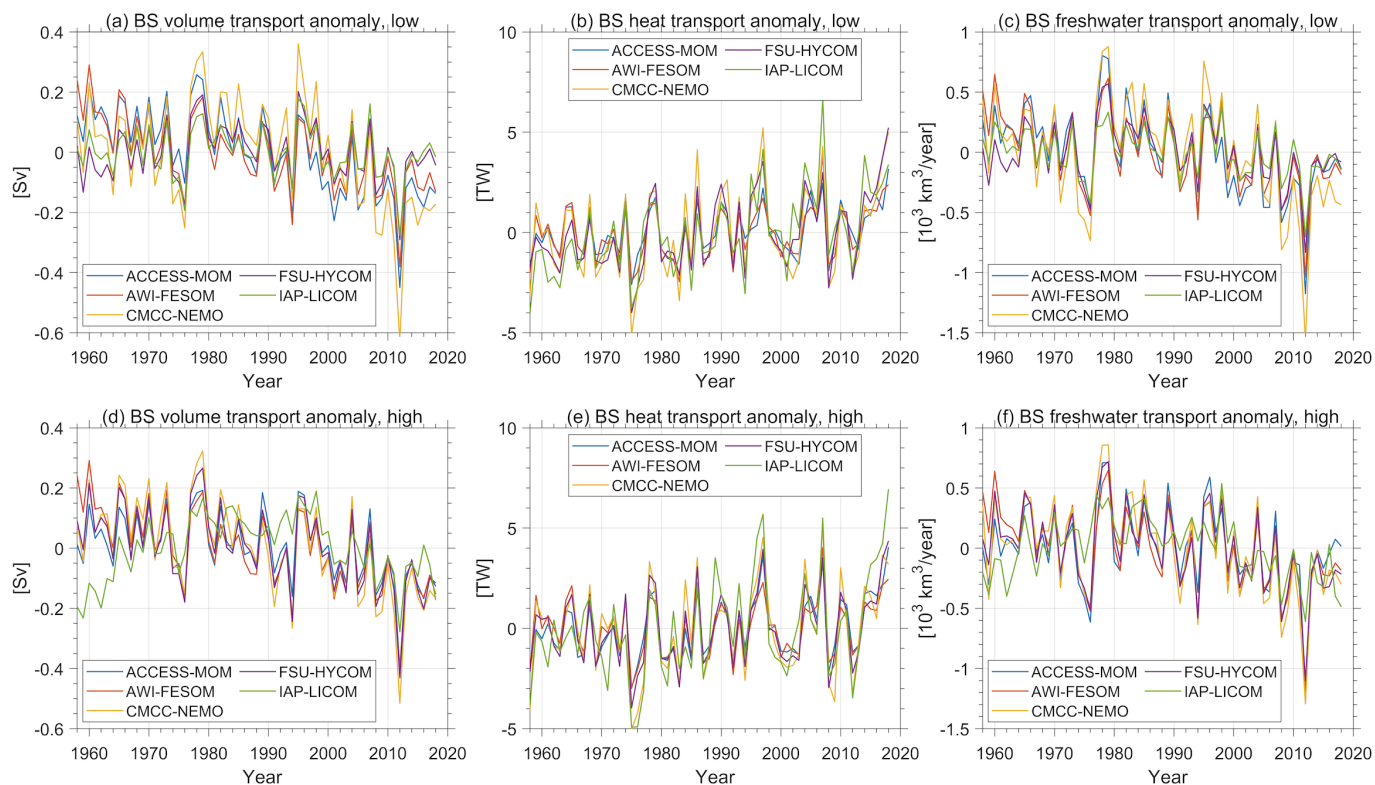

**Figure S6.** Anomalies of ocean (a) volume, (b) heat and (c) freshwater transports in the Bering Strait (BS) in low-resolution models. The anomalies are relative to the 1992–2008 mean. (d)(e)(f) The same as (a)(b)(c), but for high-resolution models. Heat transport is referenced to  $0^{\circ}\text{C}$ , and freshwater transport is referenced to 34.8 psu. This figure shows the anomalies in order to better illustrate the variability; the original time series are shown in Fig. 17 in the main text.

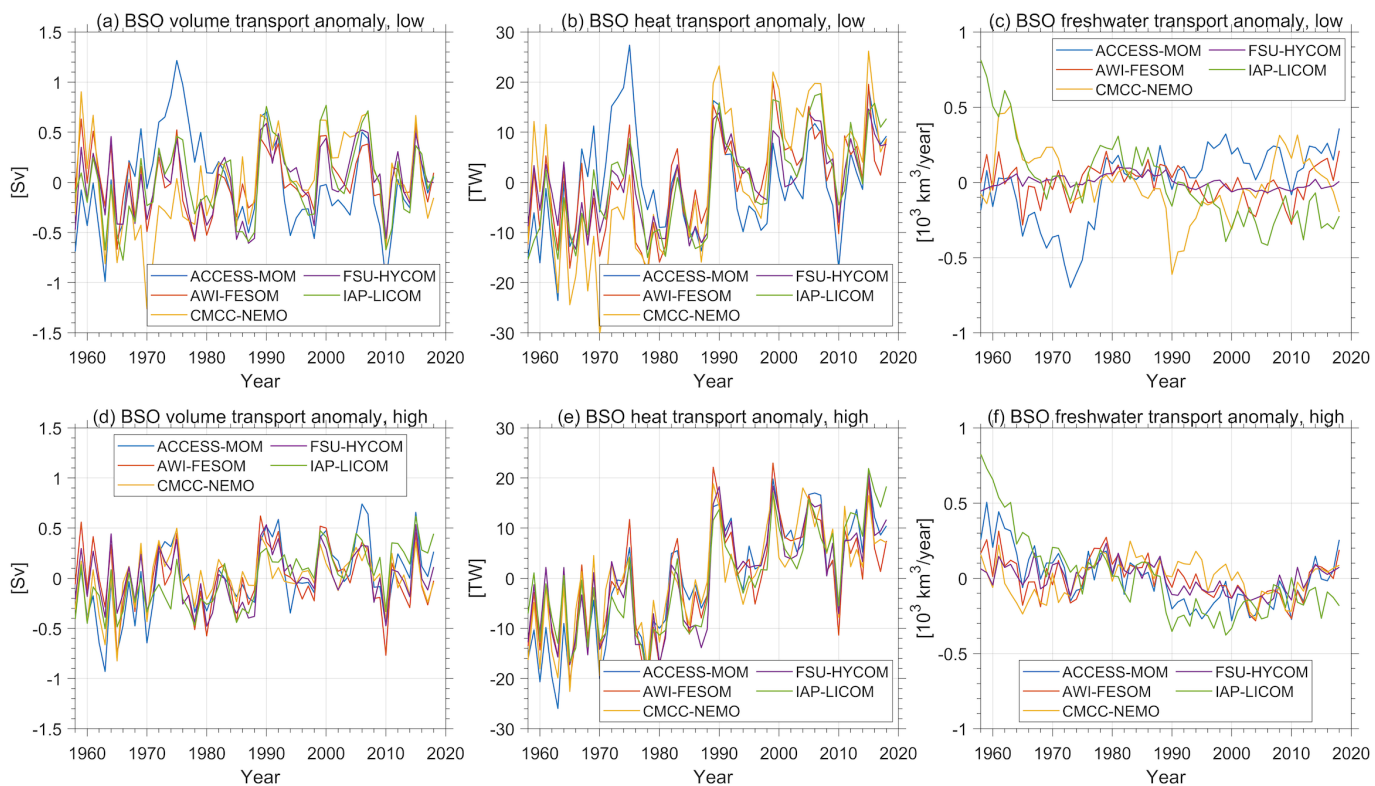

**Figure S7.** The same as Fig. S6, but for Barents Sea Opening (BSO). This figure shows the anomalies in order to better illustrate the variability; the original time series are shown in Fig. 18 in the main text.



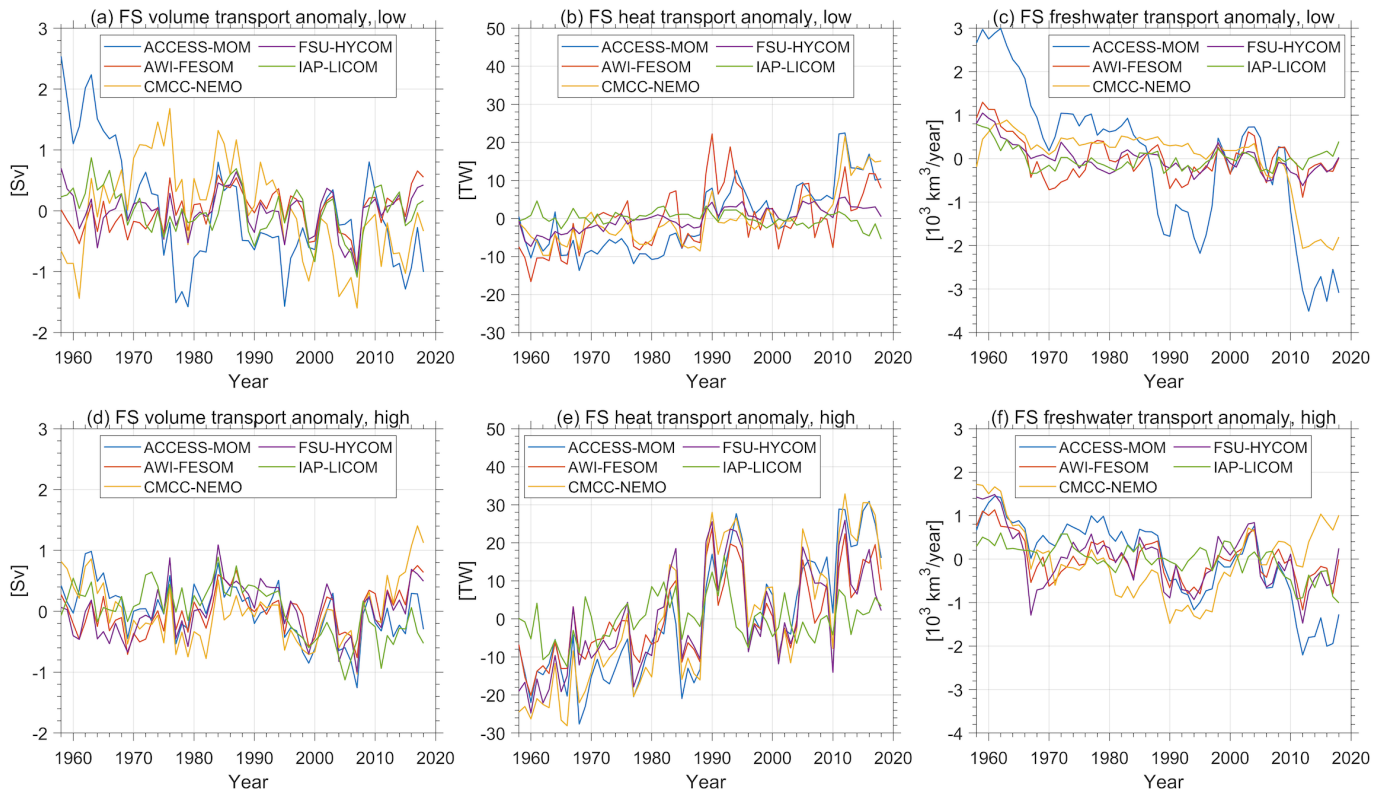

**Figure S8.** The same as Fig. S6, but for Fram Strait (FS). This figure shows the anomalies in order to better illustrate the variability; the original time series are shown in Fig. 19 in the main text.

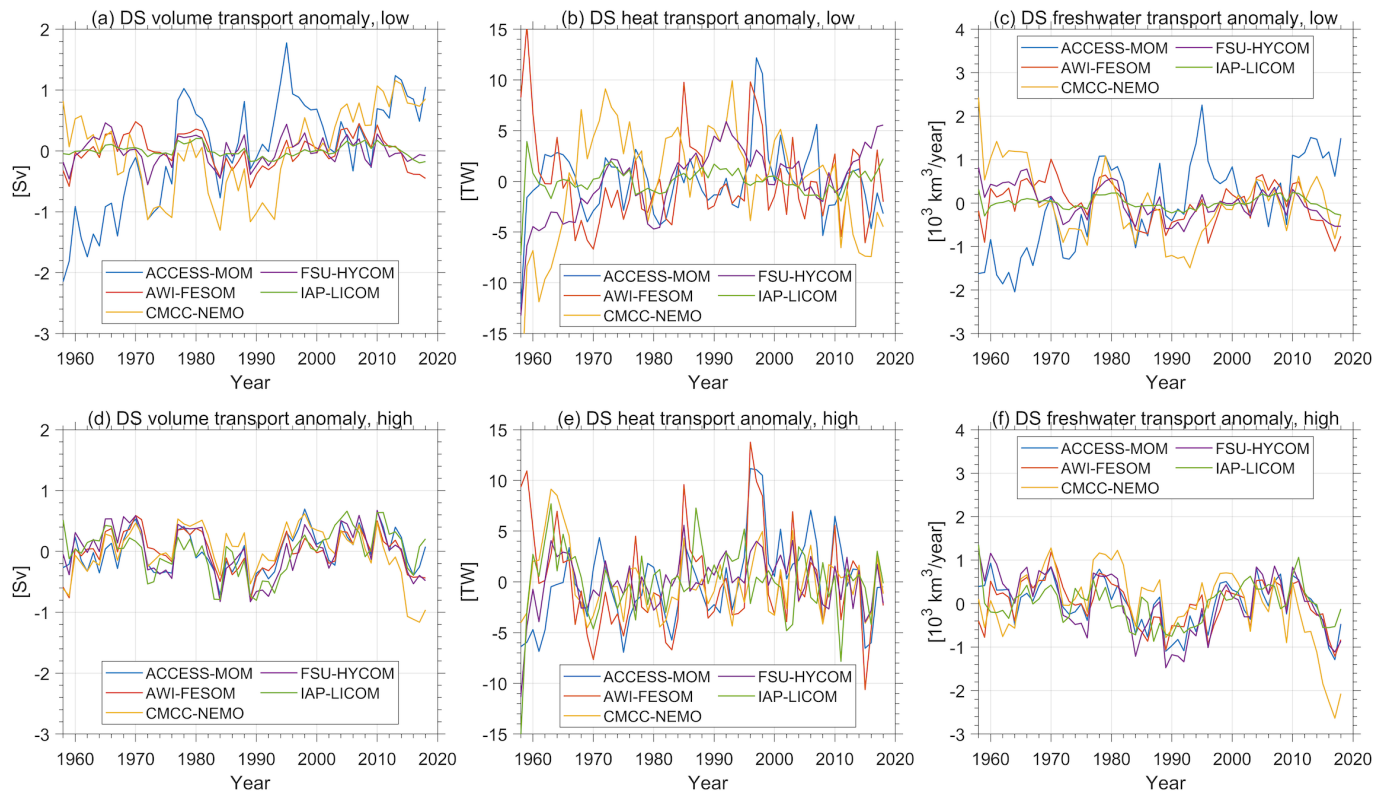

**Figure S9.** The same as Fig. S6, but for Davis Strait (DS). This figure shows the anomalies in order to better illustrate the variability; the original time series are shown in Fig. 20 in the main text.

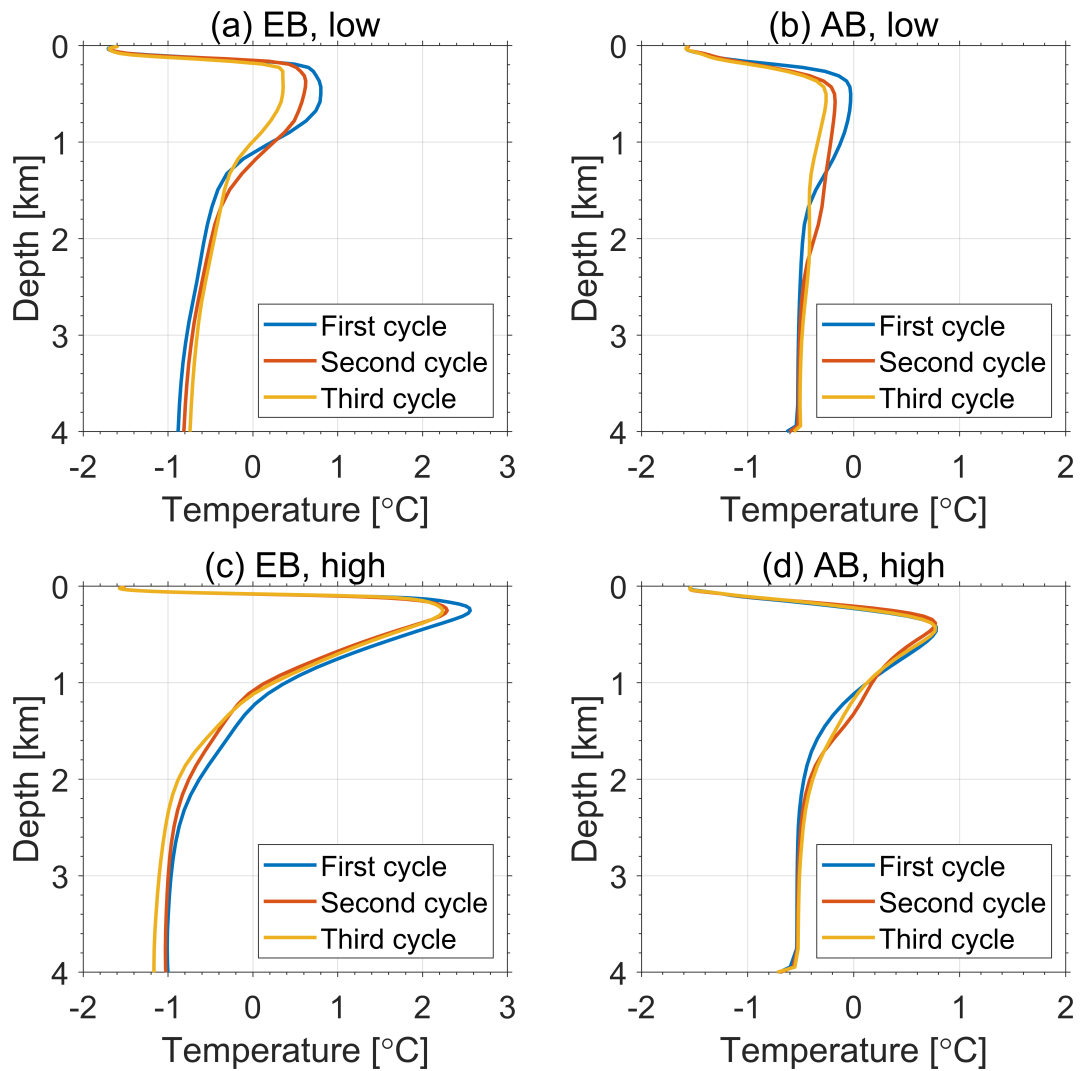

**Figure S10.** Temperature profiles in 2018 averaged in the Eurasian Basin (EB, left) and Amerasian Basin (AB, right) simulated in ACCESS-MOM. The upper panels display the low-resolution model results and lower panels the high-resolution model results. Results from three simulation cycles are shown.
